# Supplementary material for: Effect of sampling time on somatic and germ cell mutations induced by acrylamide in gpt delta mice
Source: PubMed Central journal article supplement (PMC7890838; doi:10.1186/s41021-021-00175-5), 2021-02-17

Supplementary fig. 1: experimental design

Animals: male C57BL/6J *gpt* delta mice, 8 week-old, 5~6 mice/group

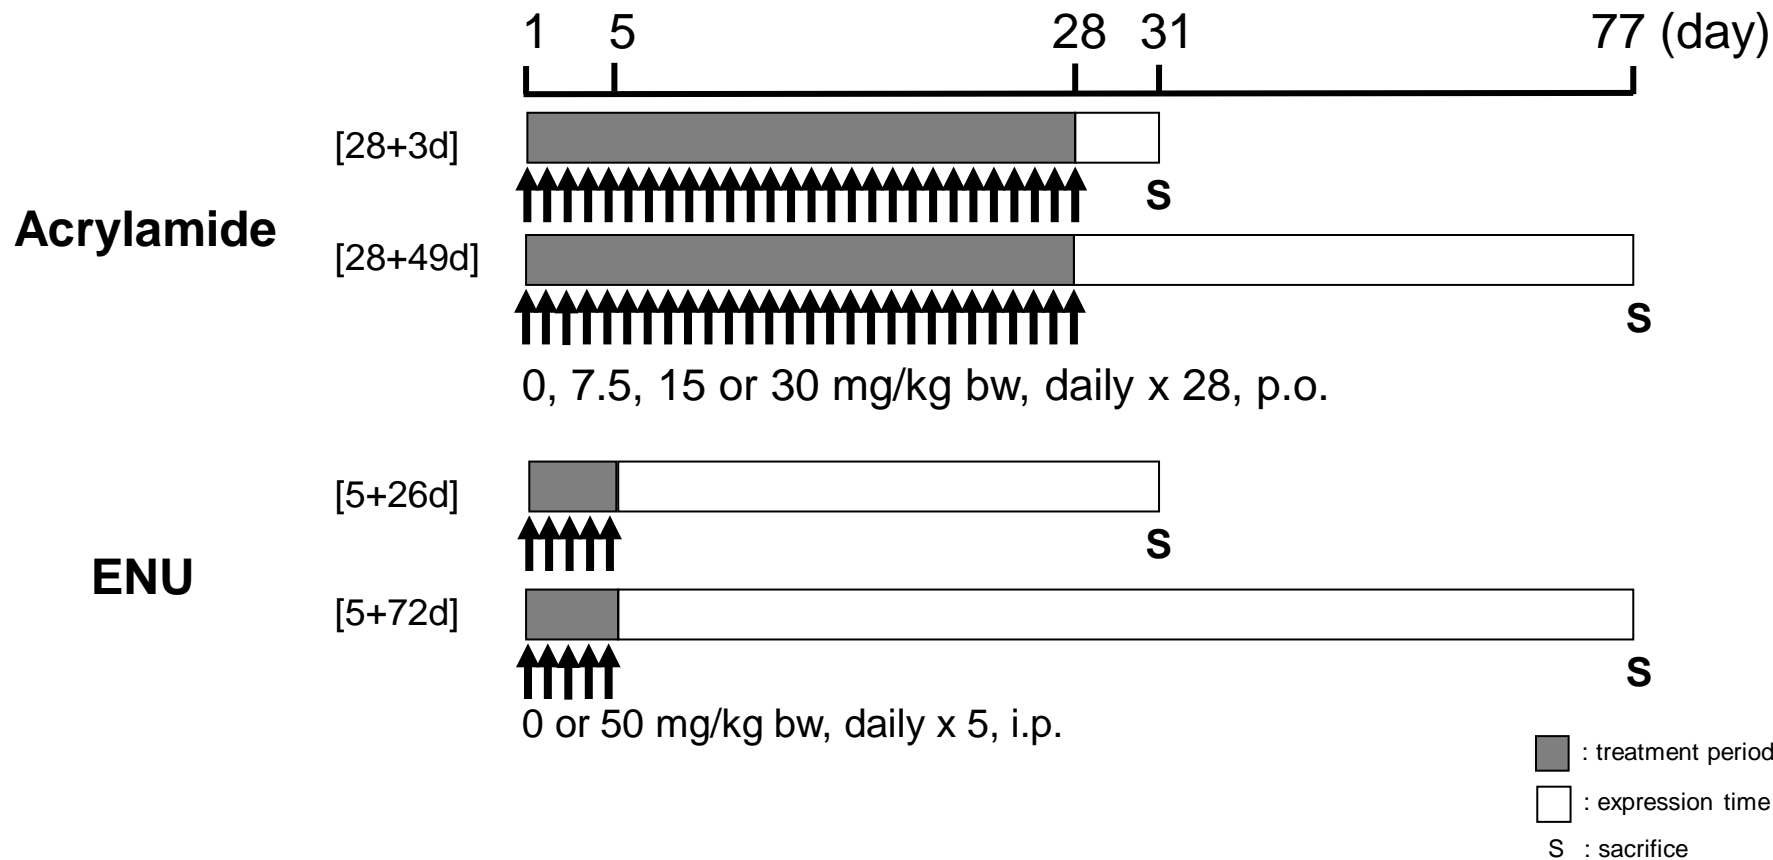

Supplement: 41021_2021_175_MOESM1_ESM.pdf [file 41021_2021_175_MOESM1_ESM.pdf]
